# Supplementary material for: Condensin Relocalization from Centromeres to Chromosome Arms Promotes Top2 Recruitment during Anaphase
Source: PubMed Central journal article supplement — Cell Rep. 2015 Dec 10;13(11):2336–44. doi: 10.1016/j.celrep.2015.11.041 (PMC4695335; doi:10.1016/j.celrep.2015.11.041), 2015-12-10

**Data S2.** Genome-wide association of Smc2-3HA in *cdc20*-depletion arrests in the absence of nocodazole.

chrI

genes

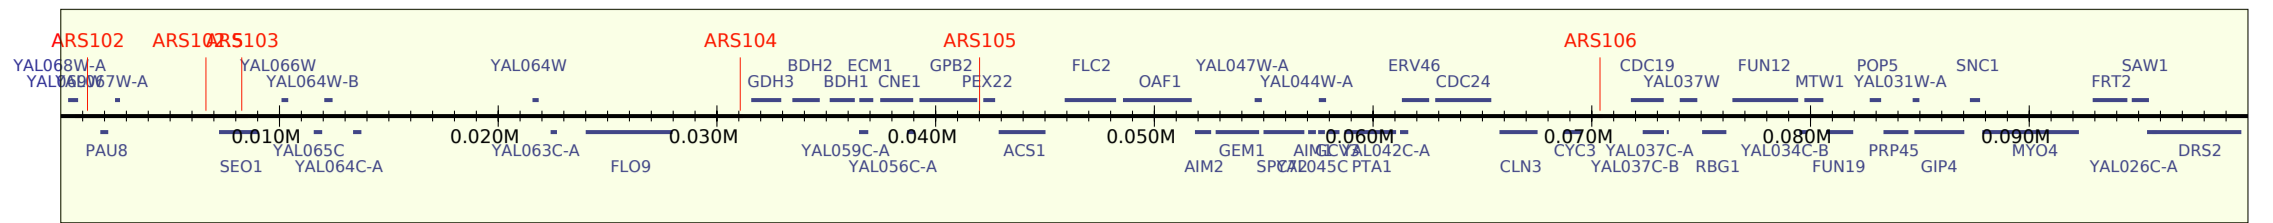

Smc2\_pnNZ

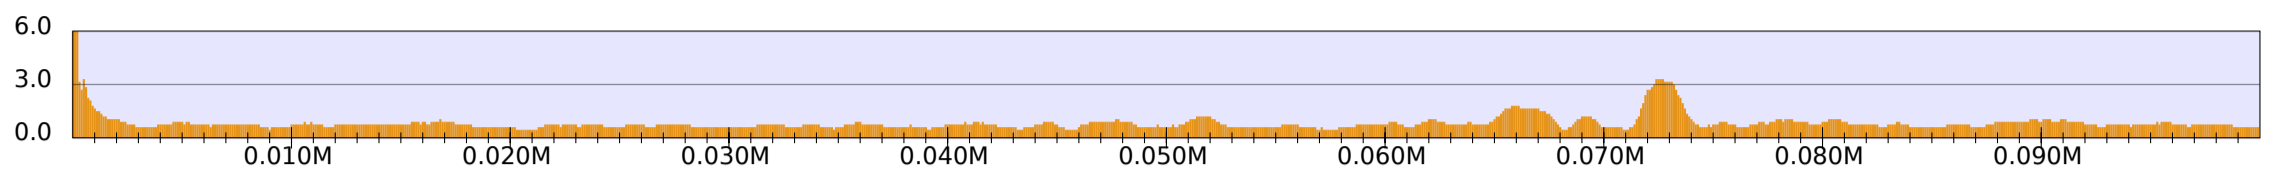

genes

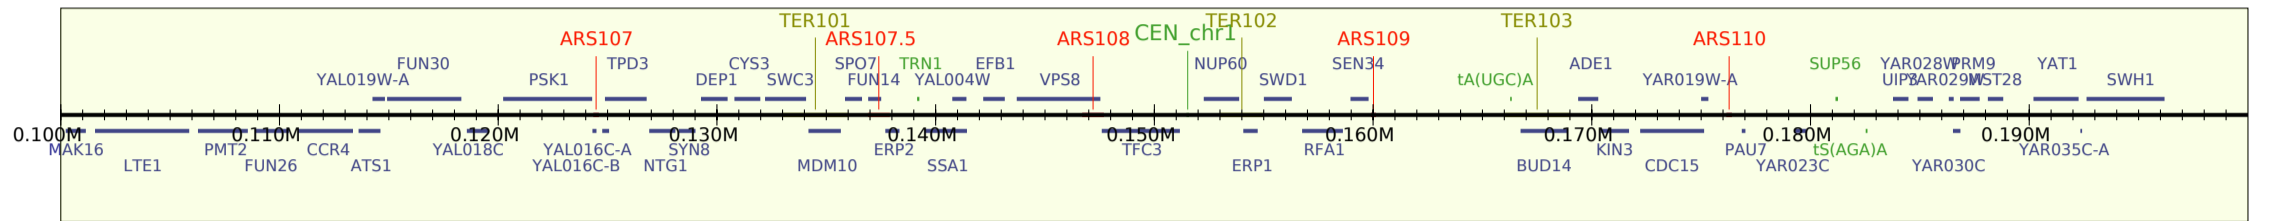

Smc2\_pnNZ

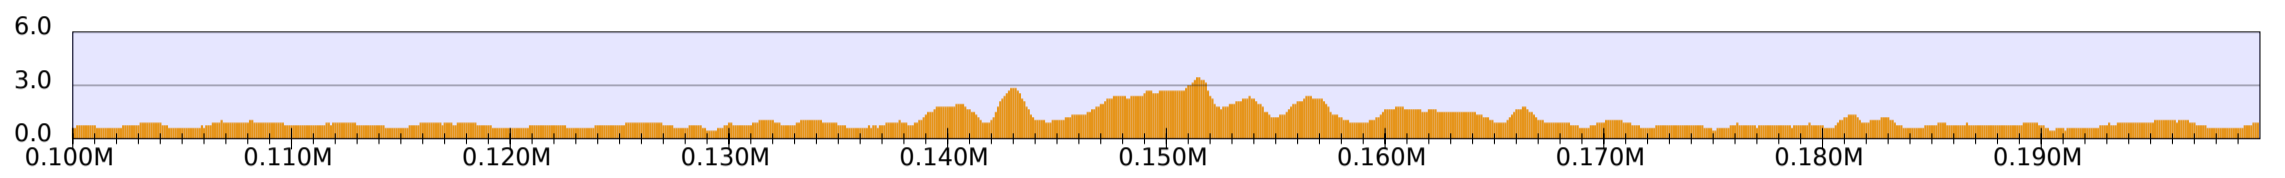

genes

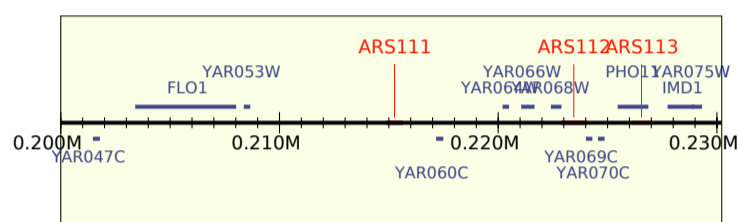

Smc2\_pnNZ

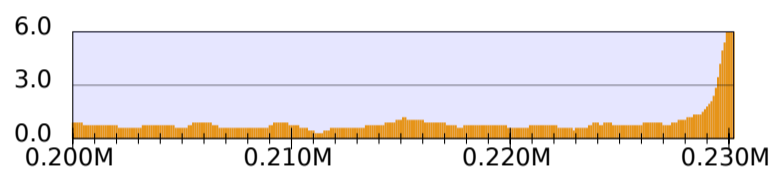



chrII\_2

genes

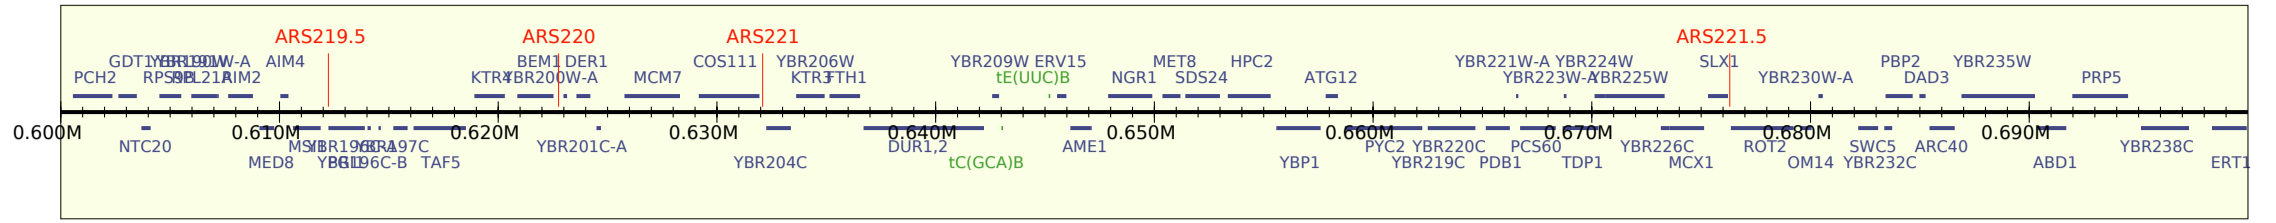

Smc2\_pnNZ

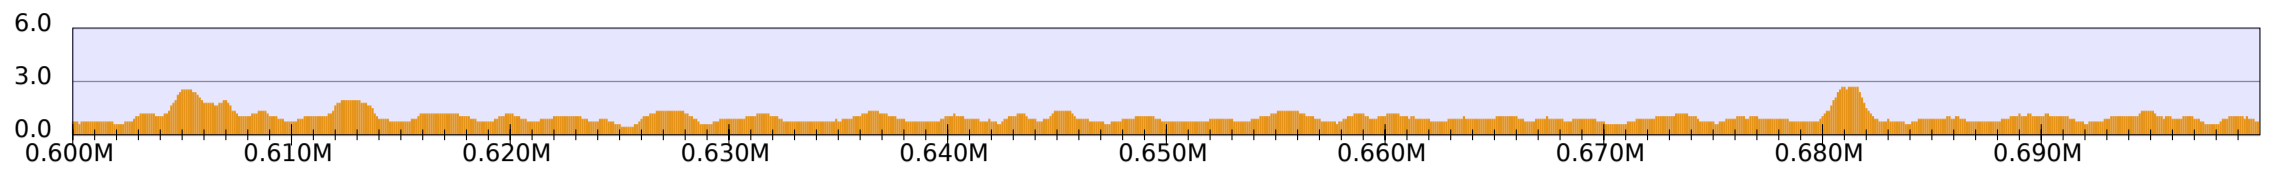

genes

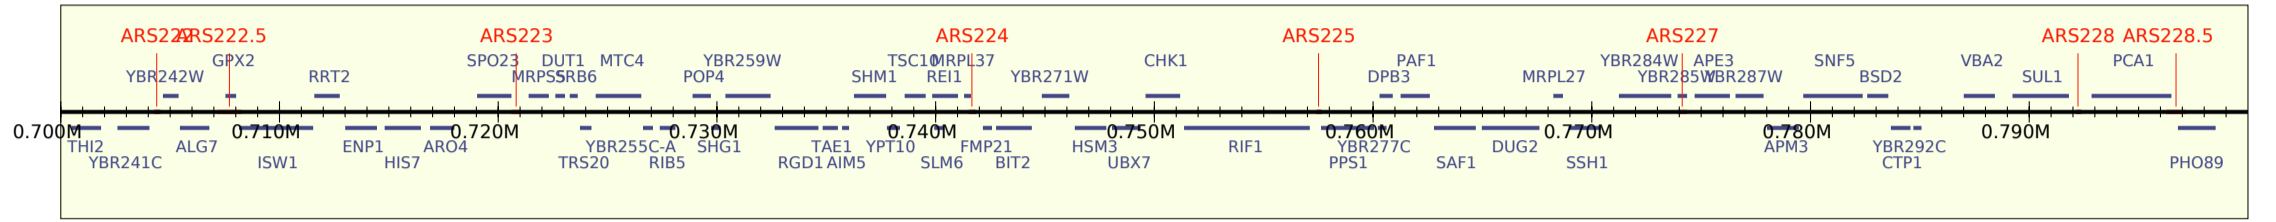

Smc2\_pnNZ

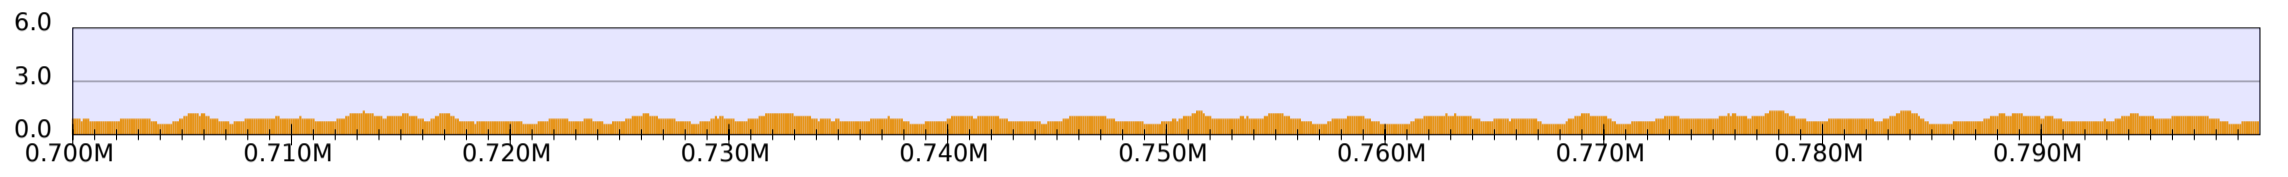

genes

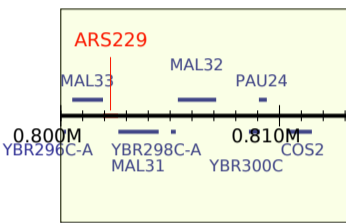

Smc2\_pnNZ

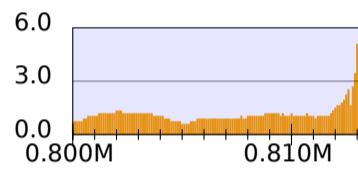

chrIII

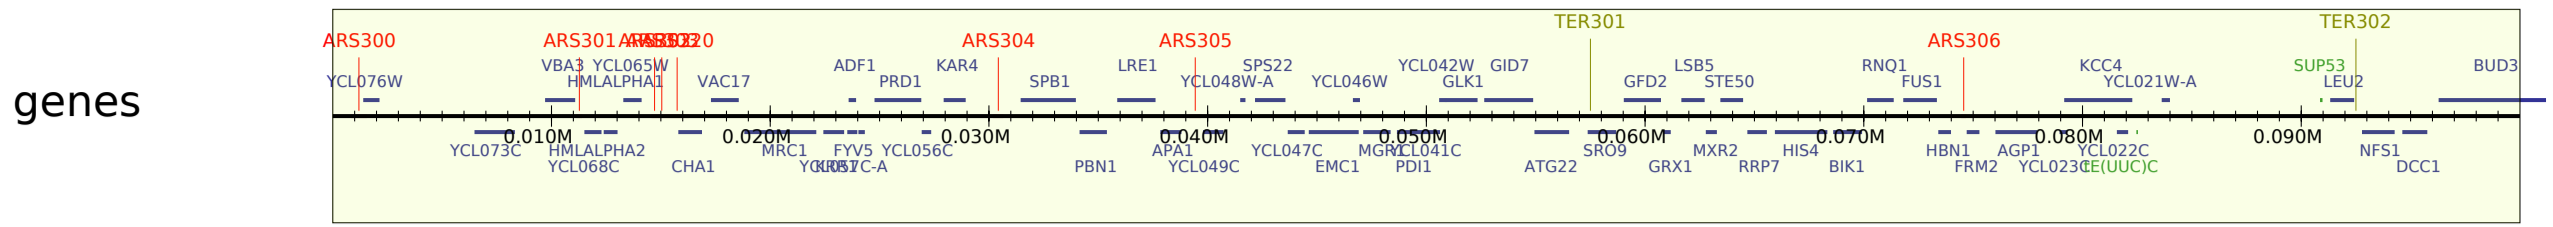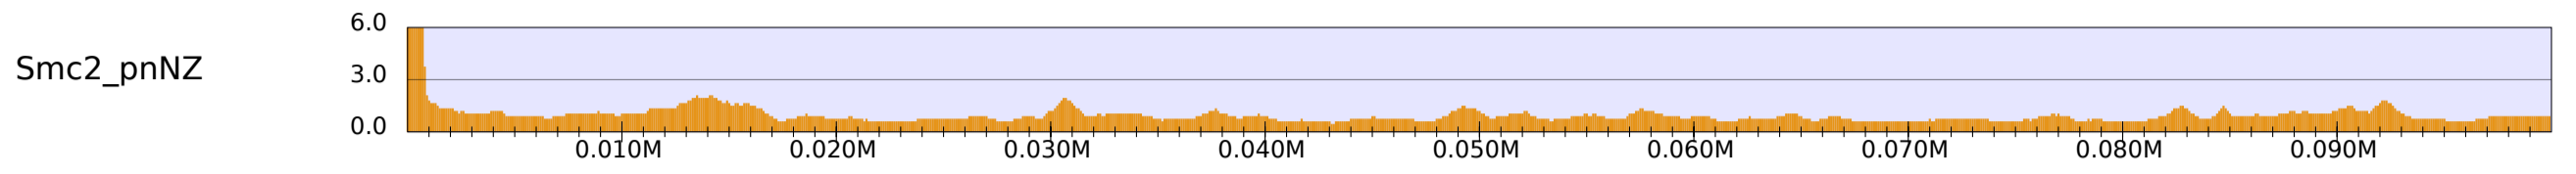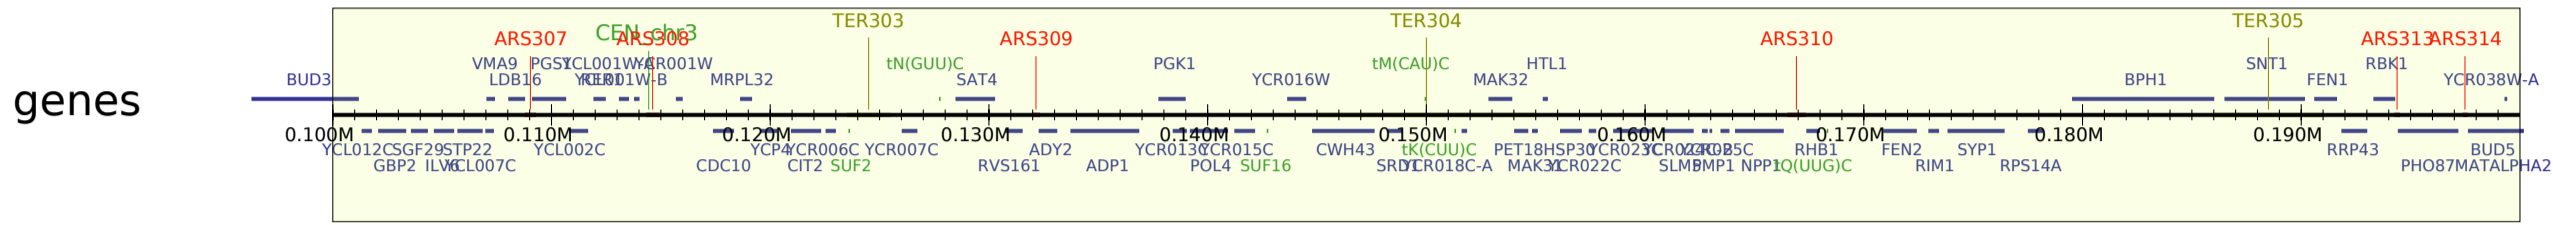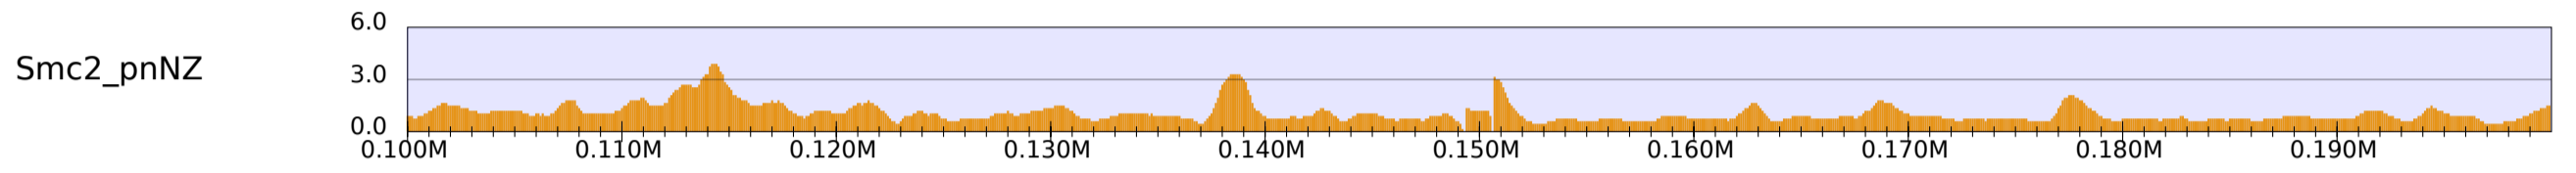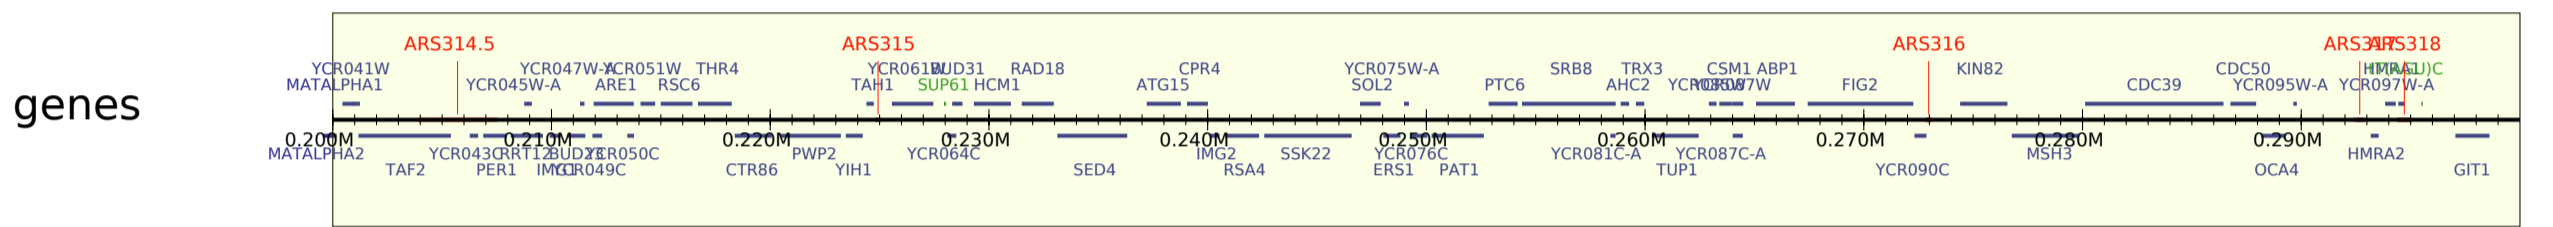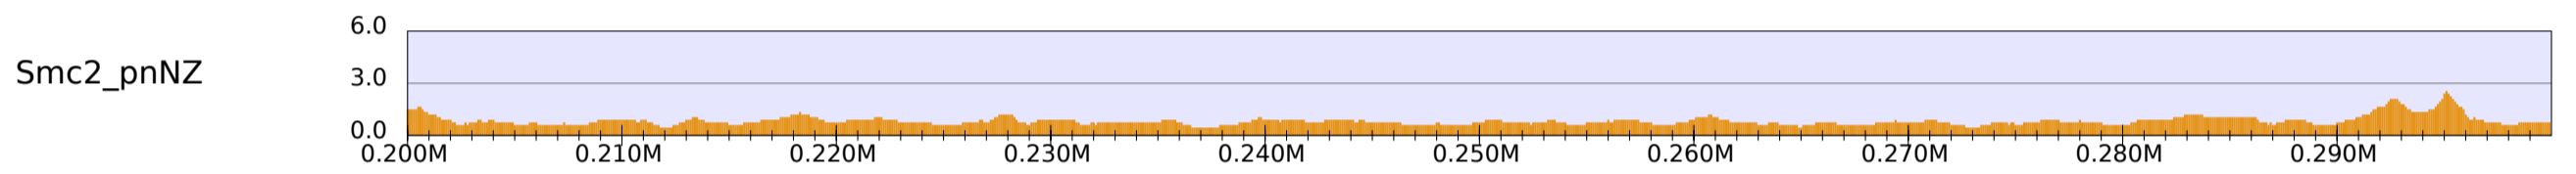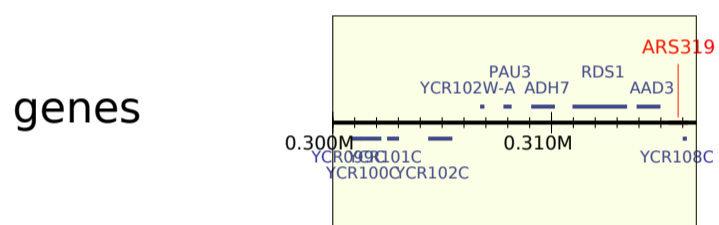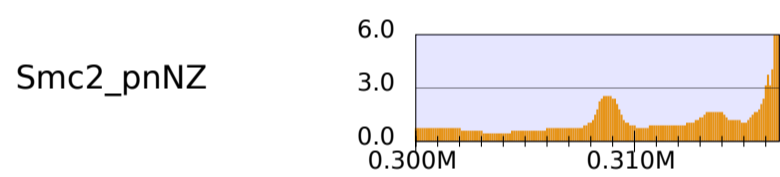









chrV

genes

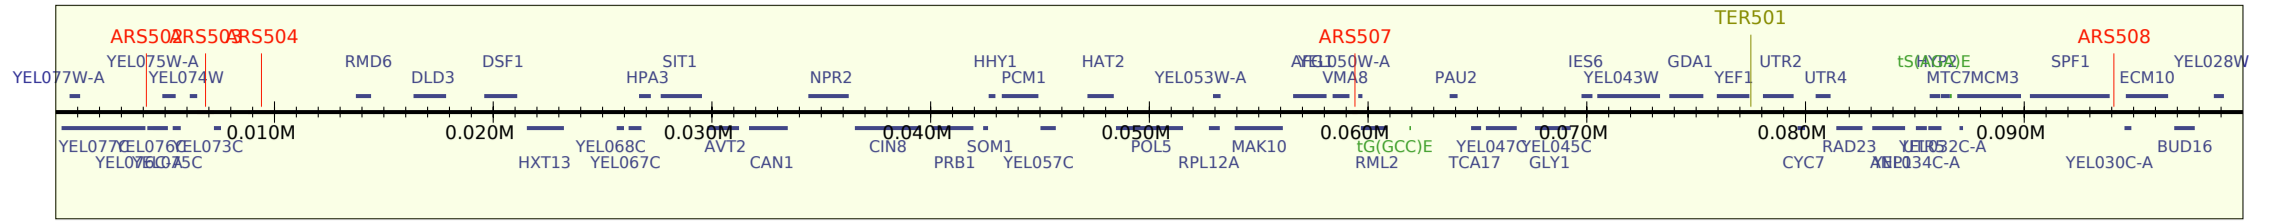

Smc2\_pnNZ

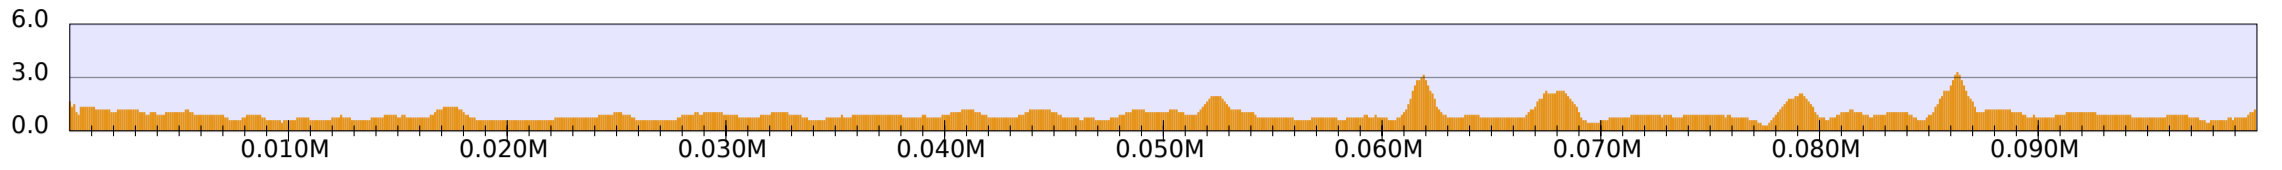

genes

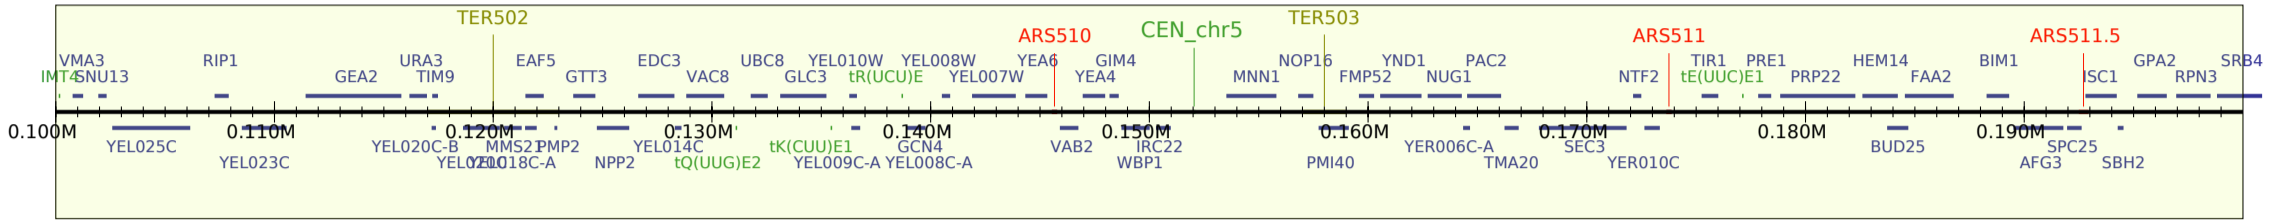

Smc2\_pnNZ

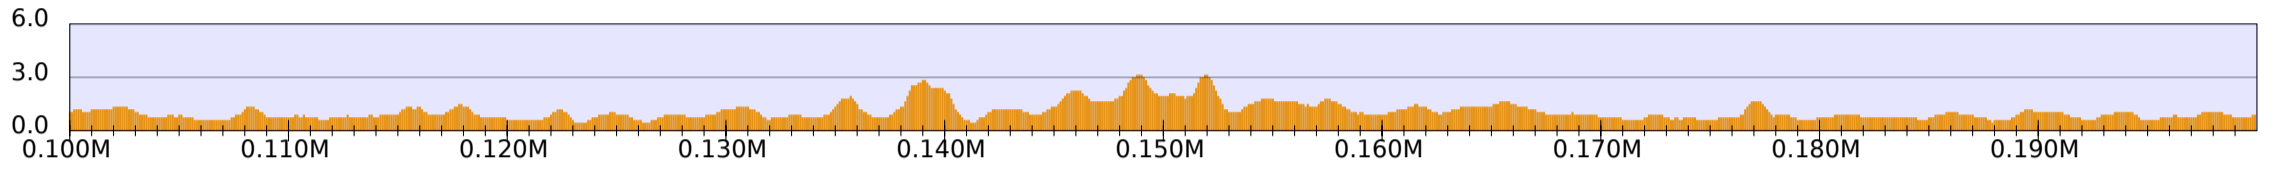

genes

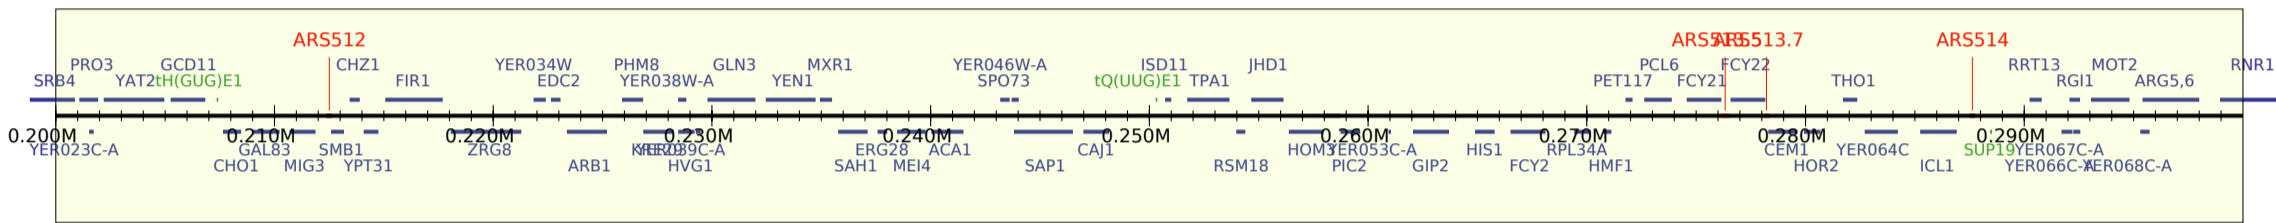

Smc2\_pnNZ

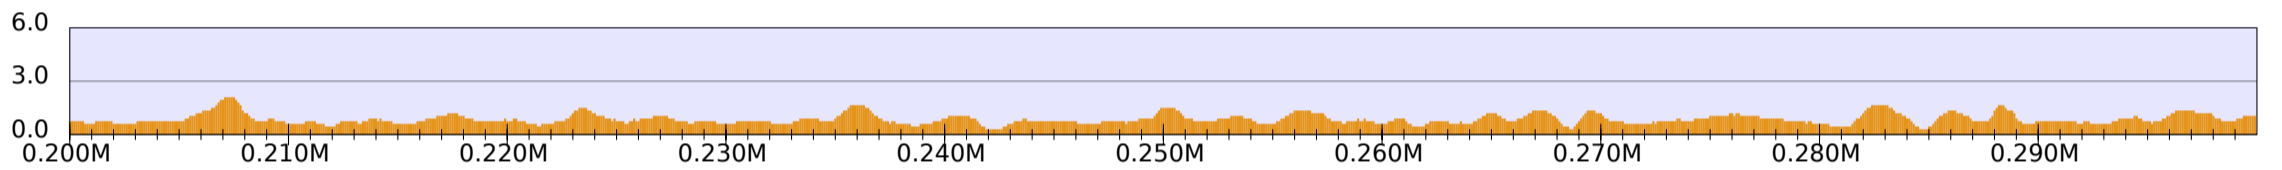

genes

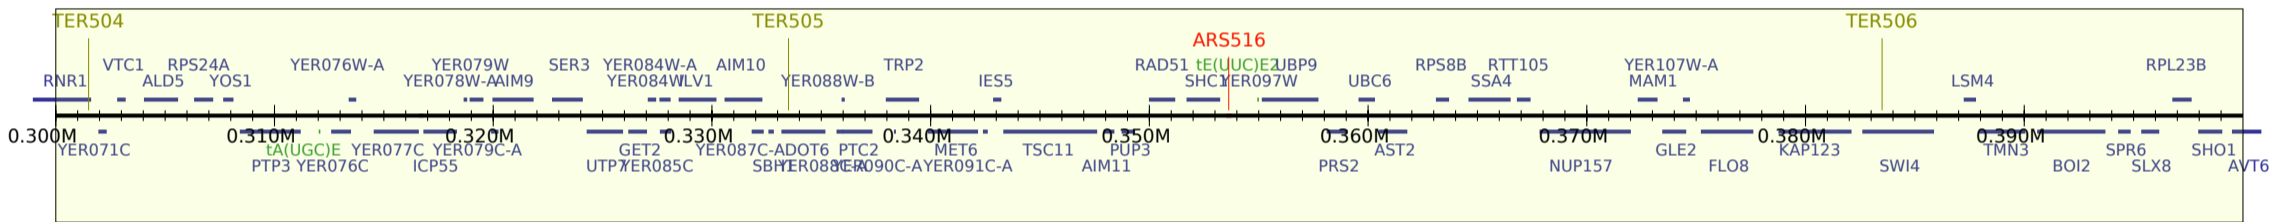

Smc2\_pnNZ

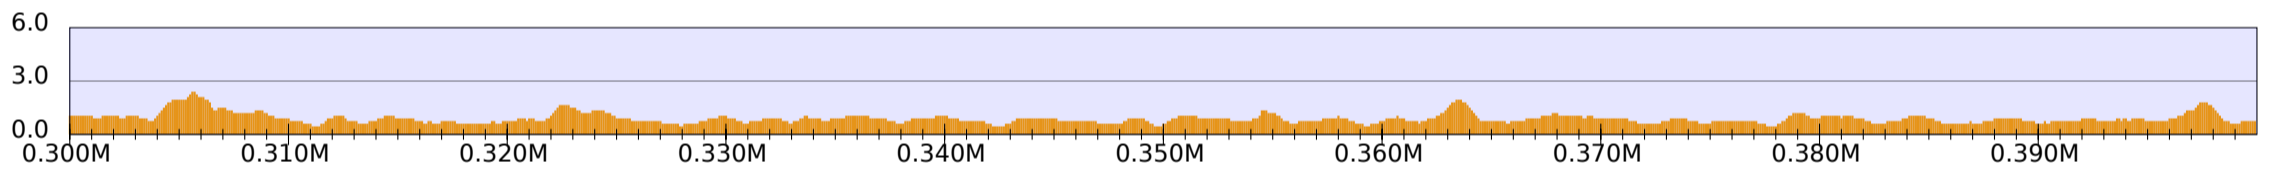

genes

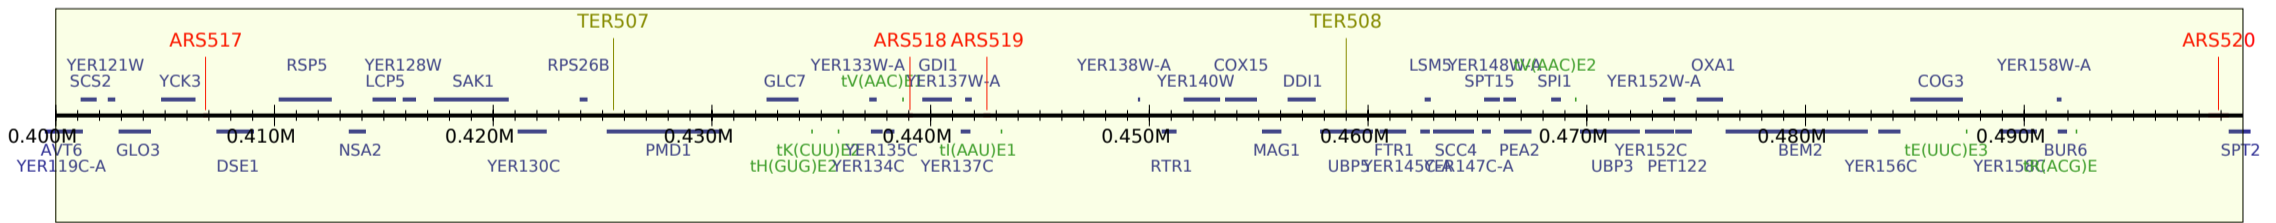

Smc2\_pnNZ

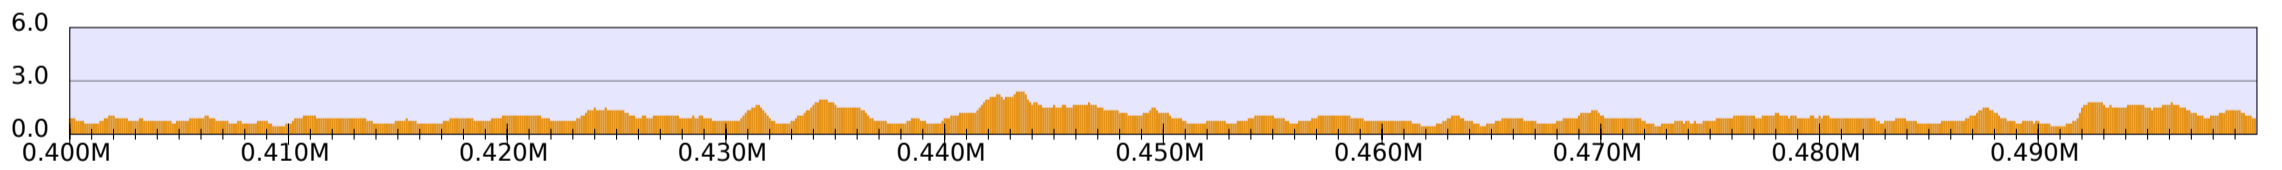

genes

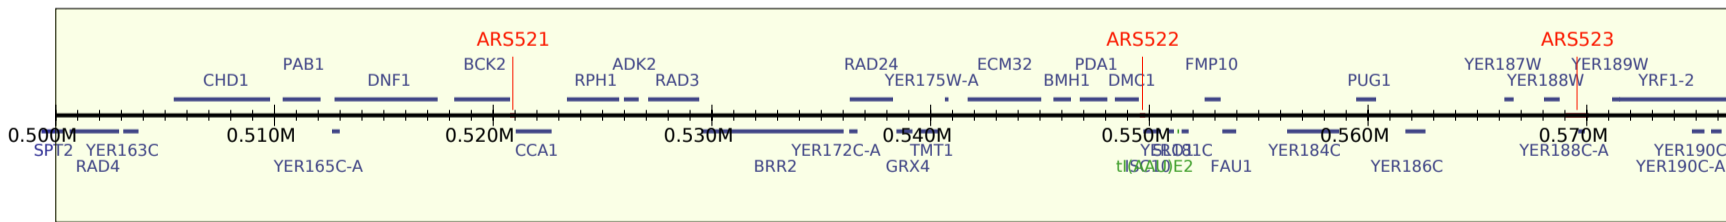

Smc2\_pnNZ

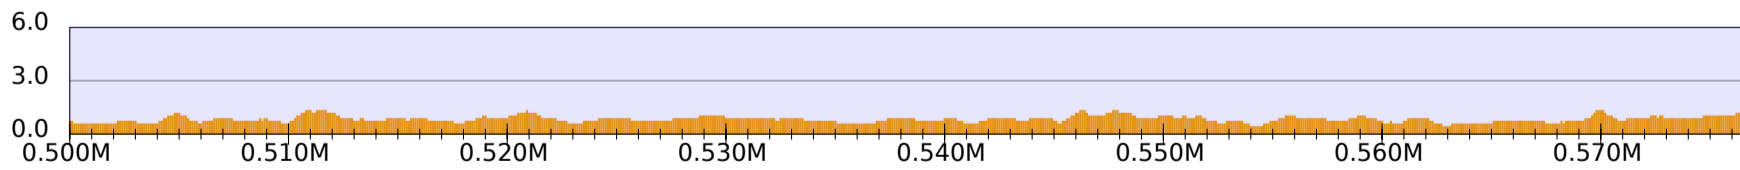















chrX\_2

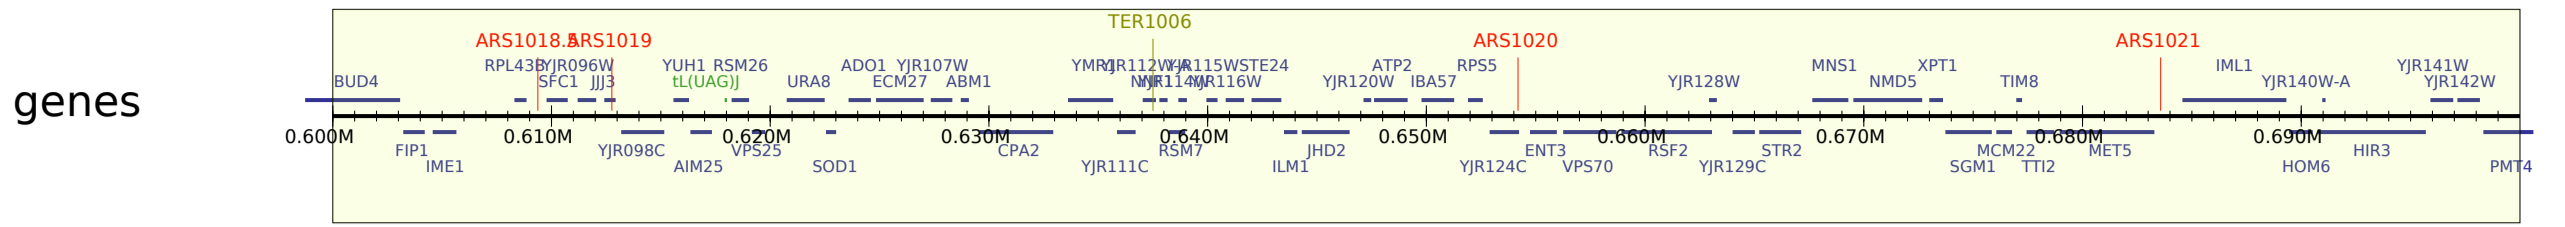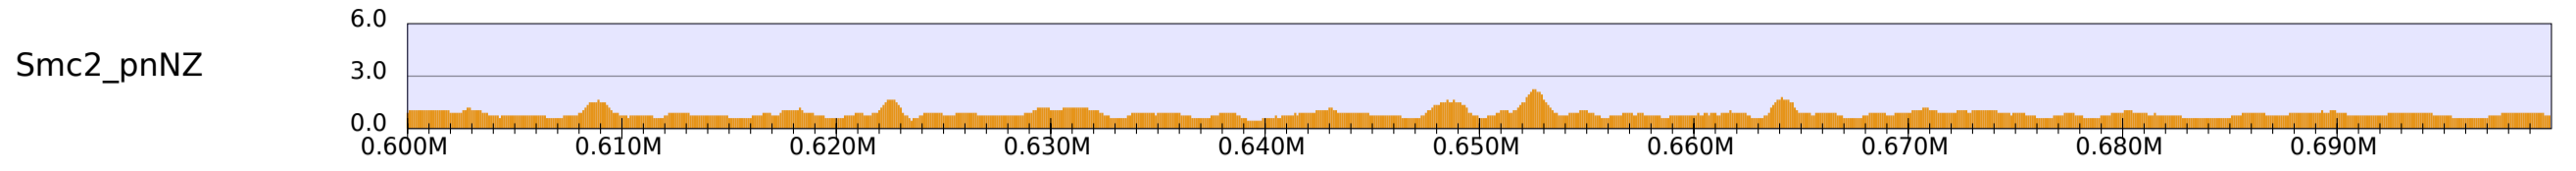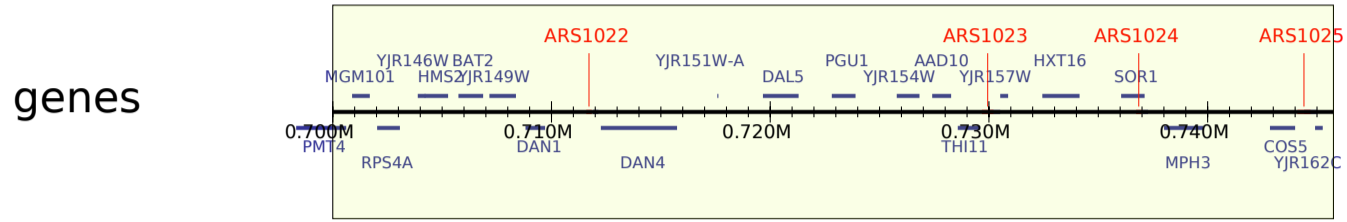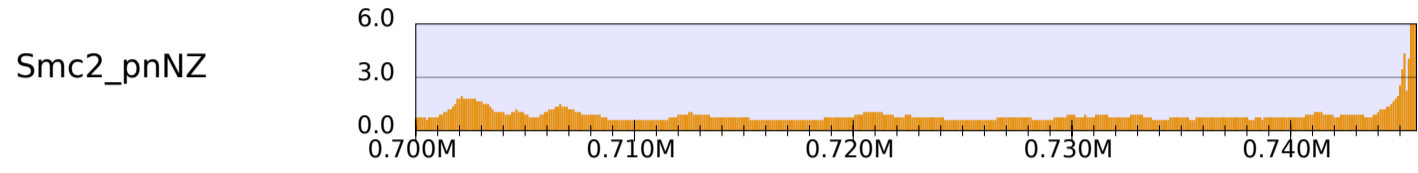





chrXI\_2

genes

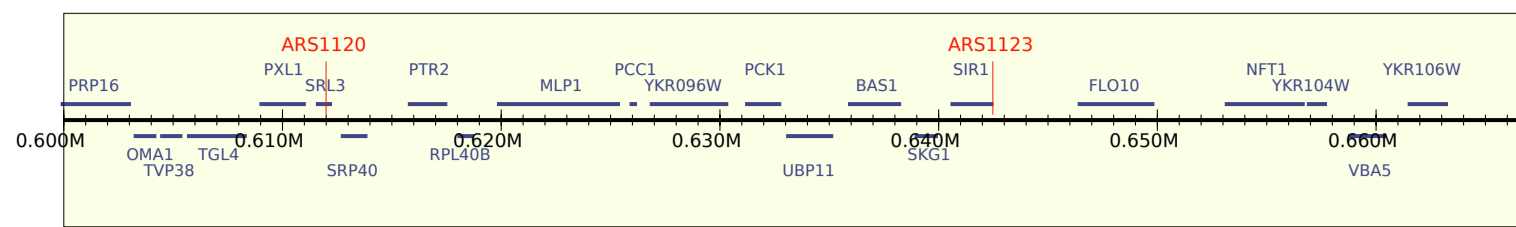

Smc2\_pnNZ

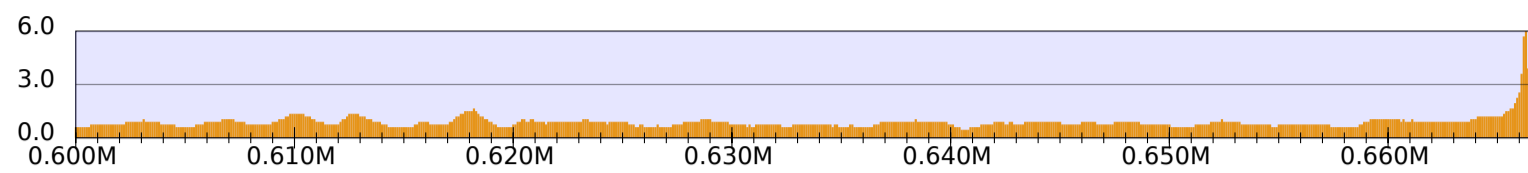







chrXIII\_2

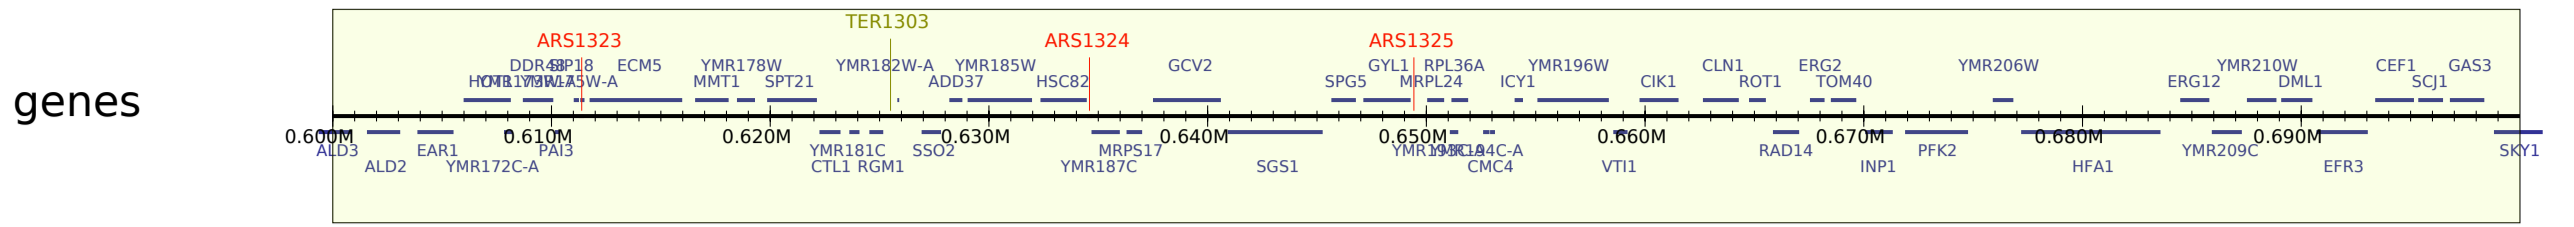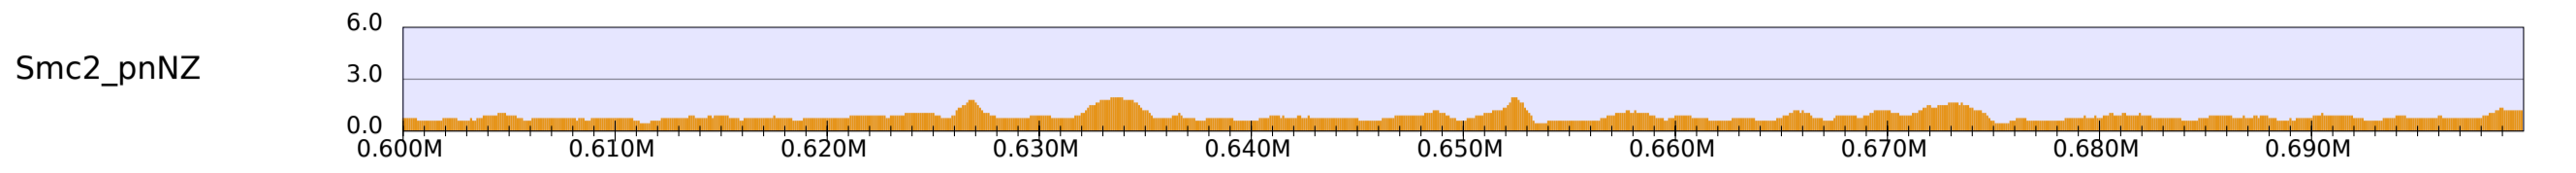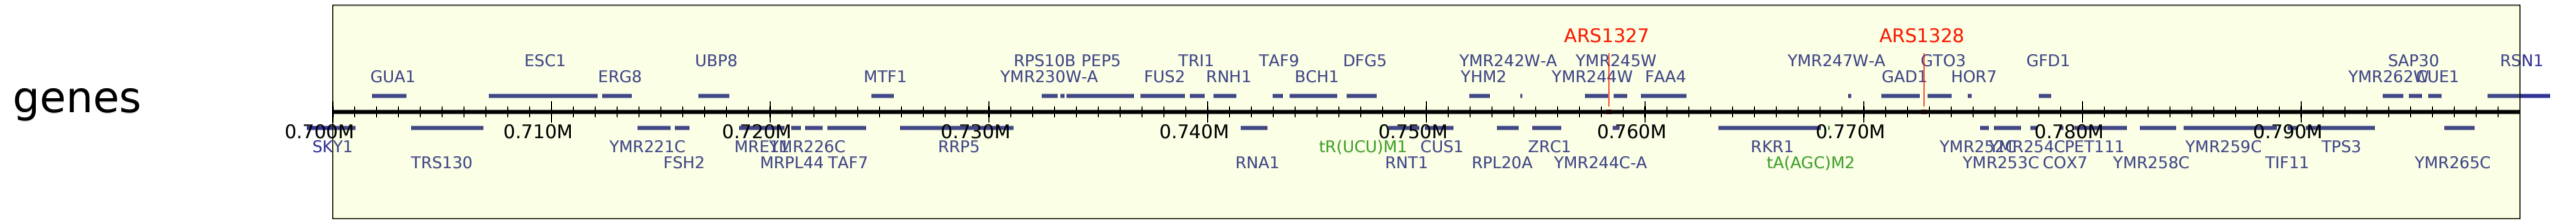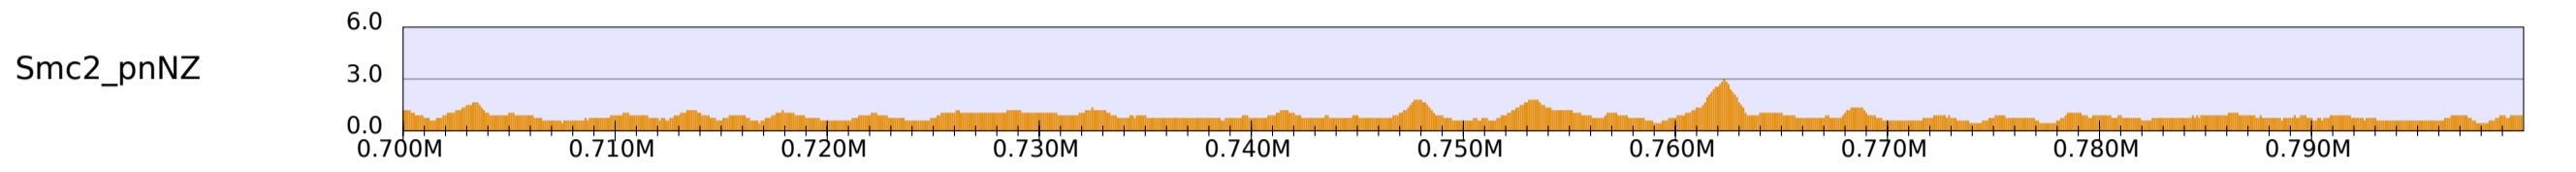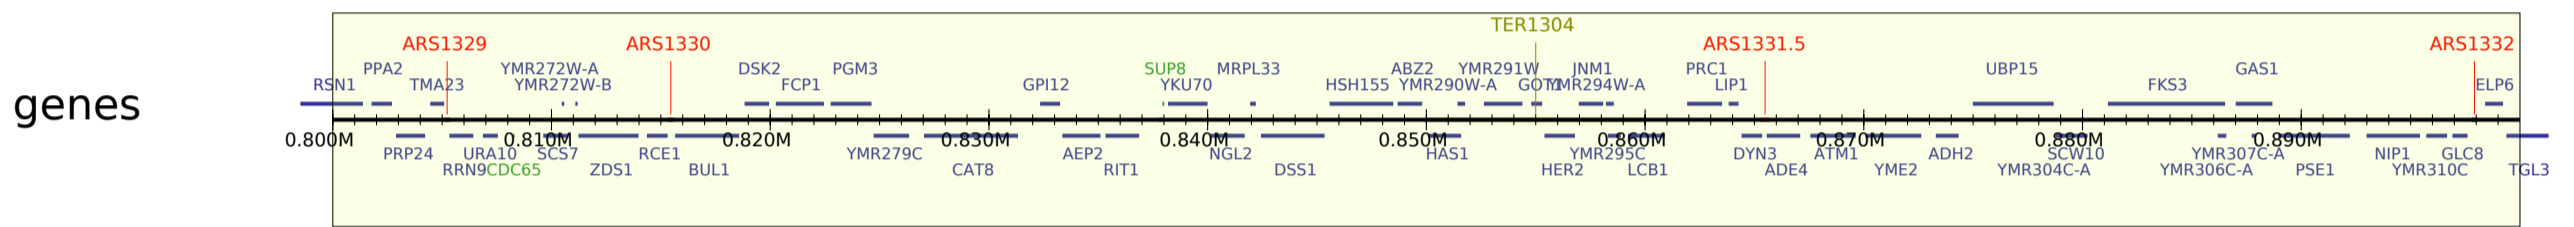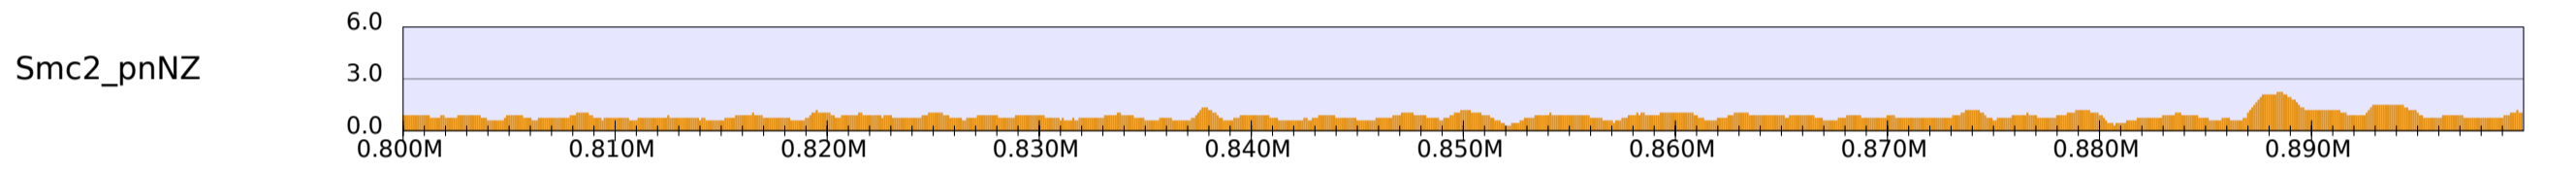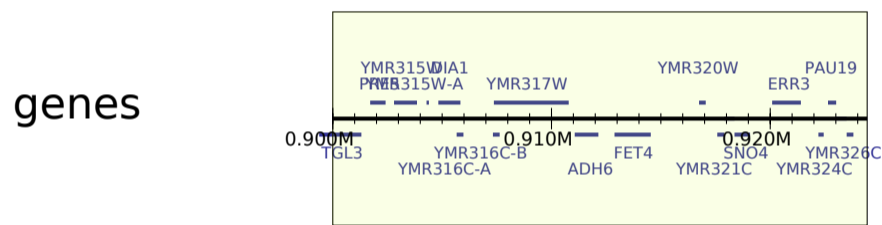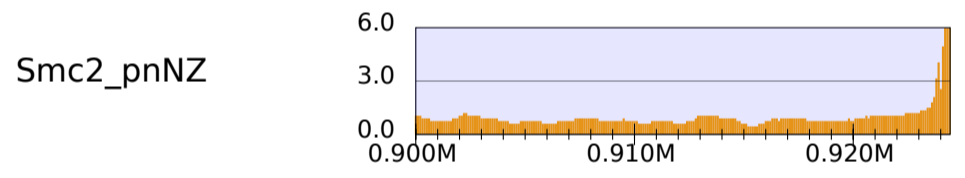

chrXIV\_1

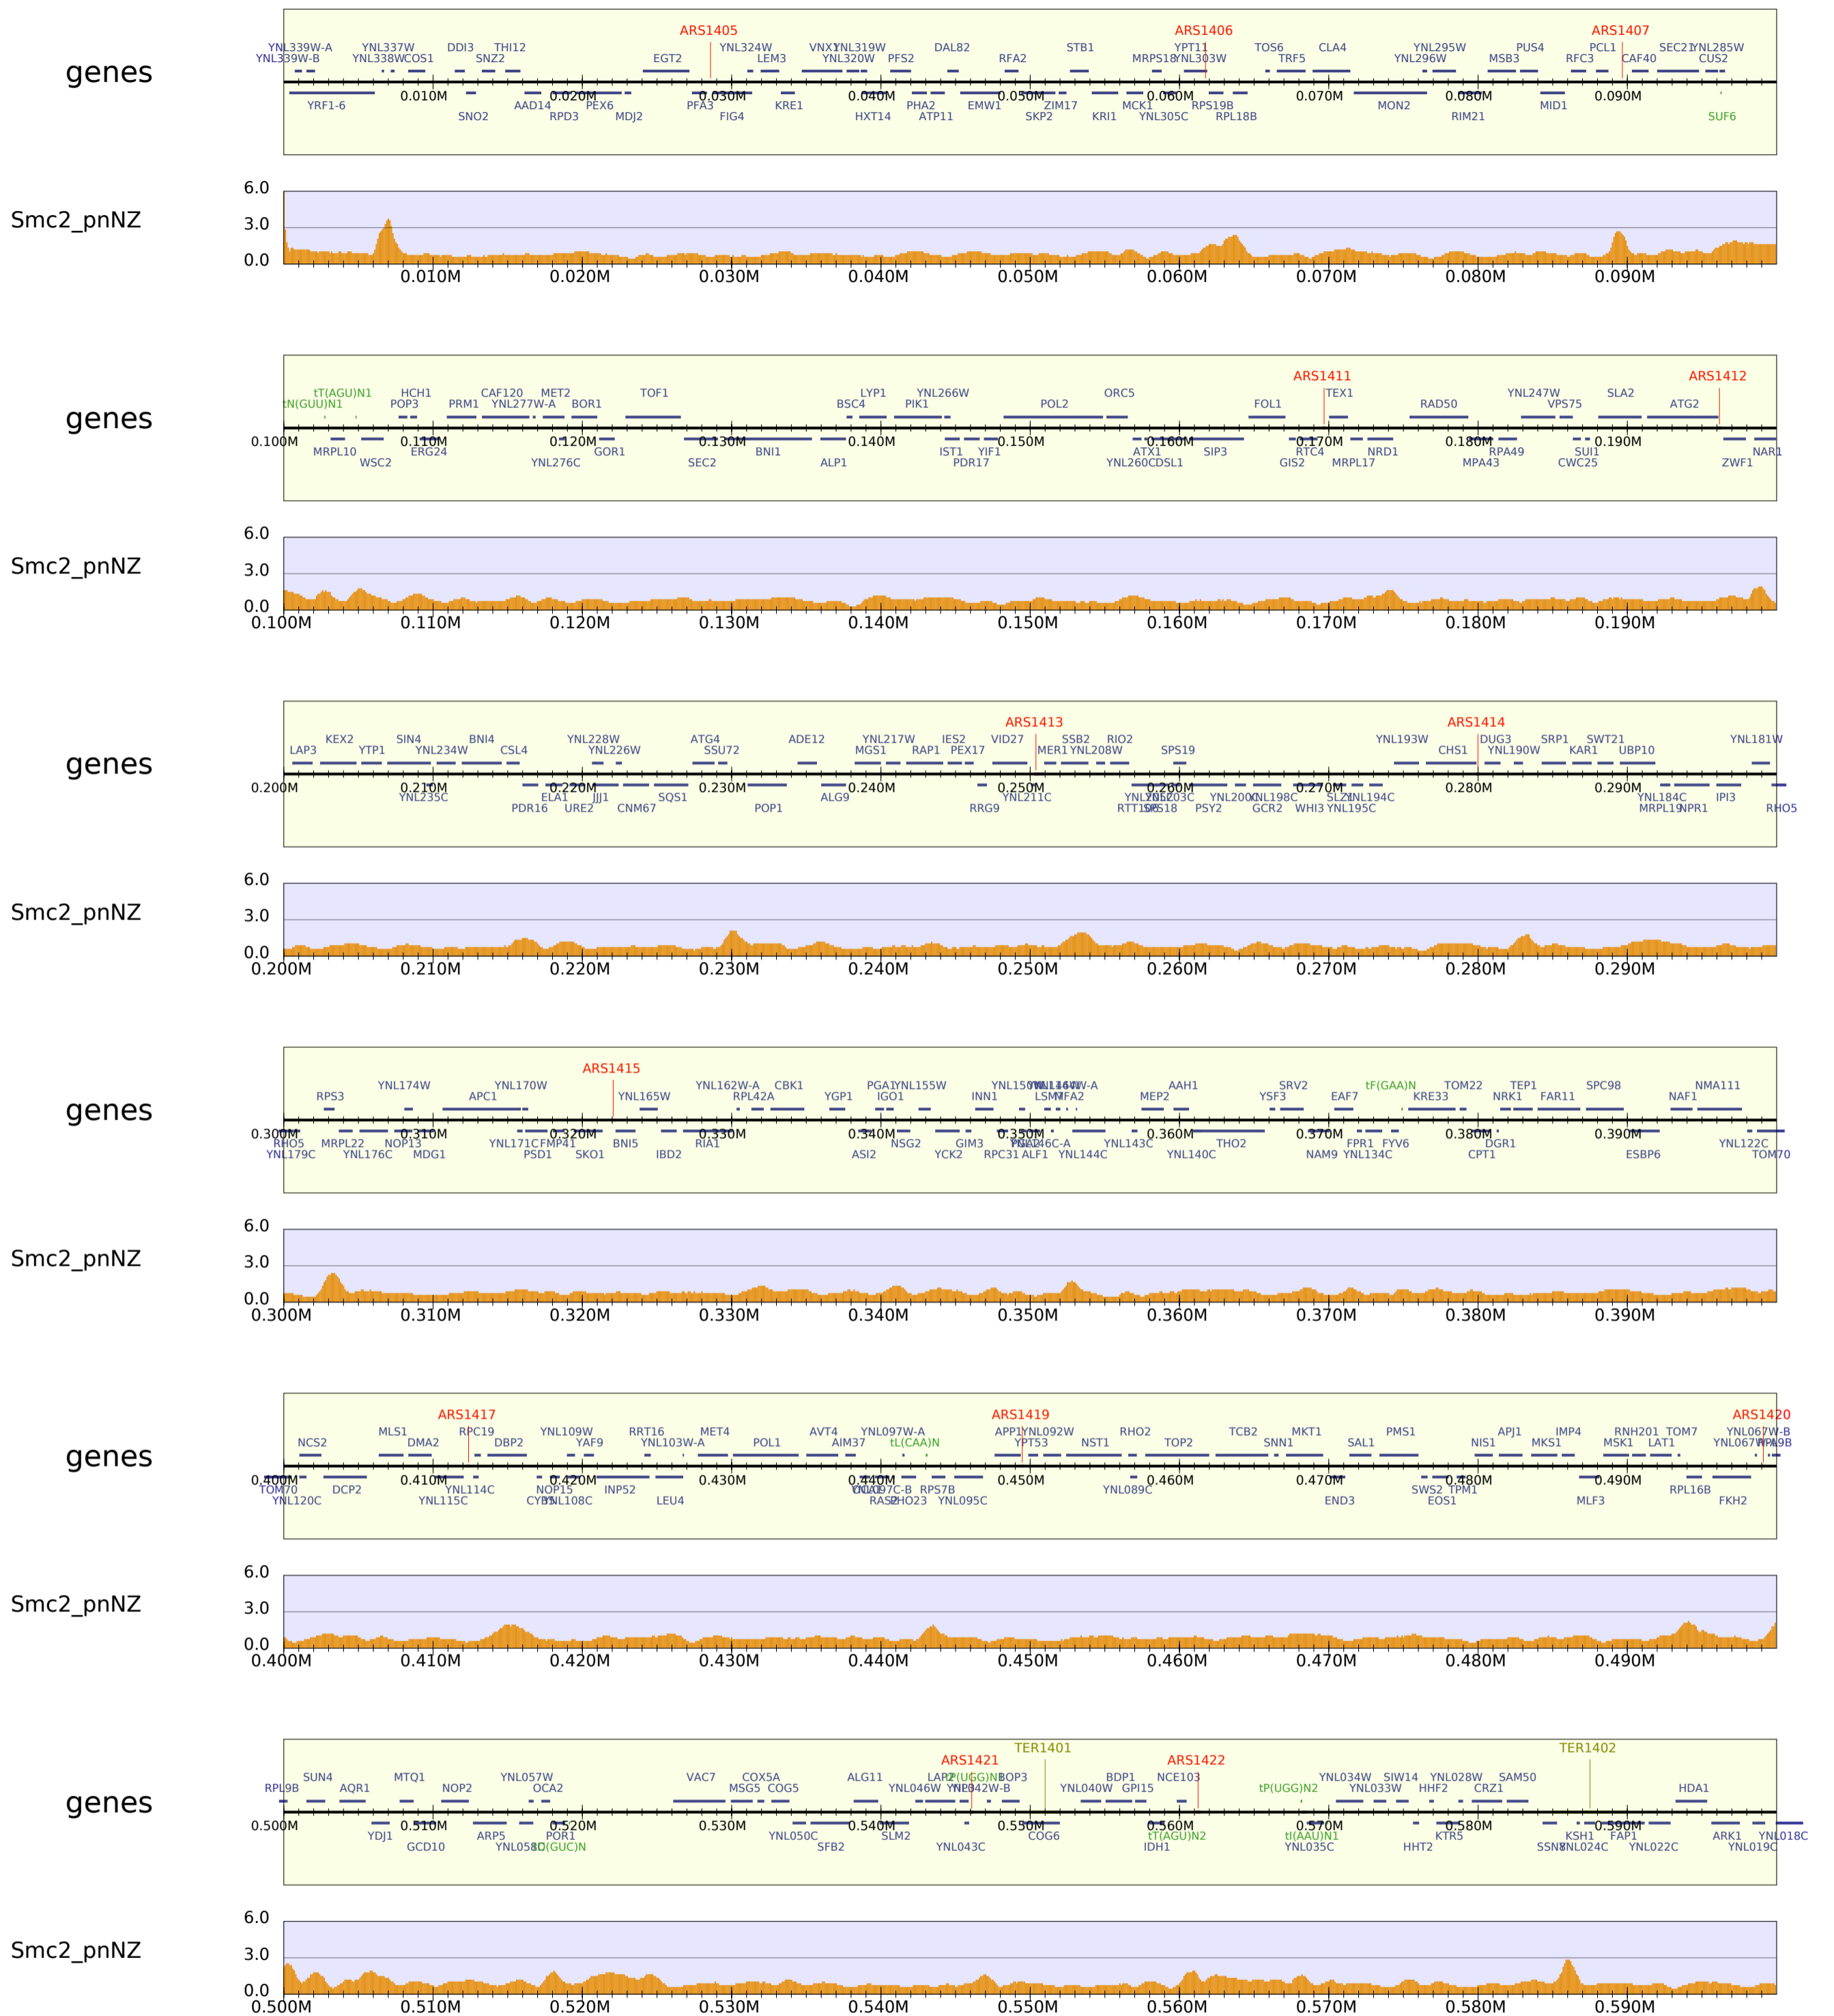

chrXIV\_2

genes

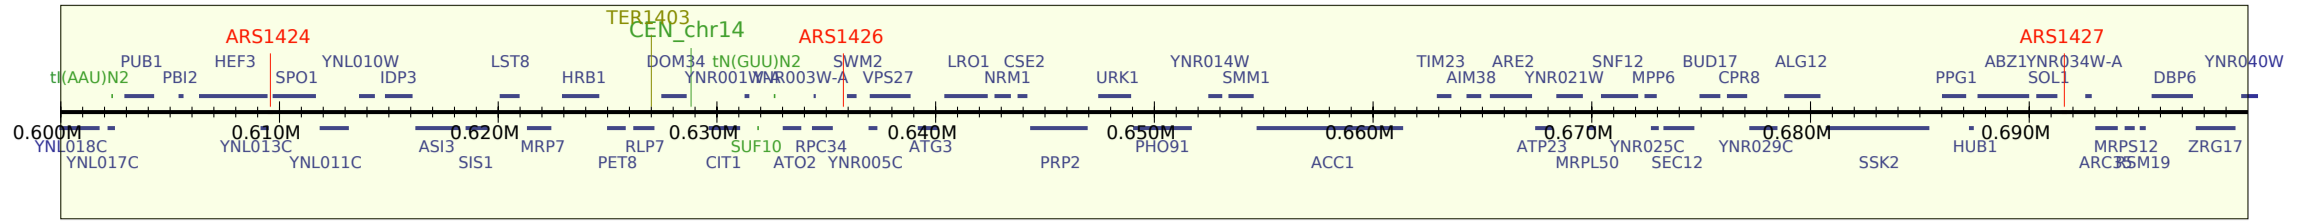

Smc2\_pnNZ

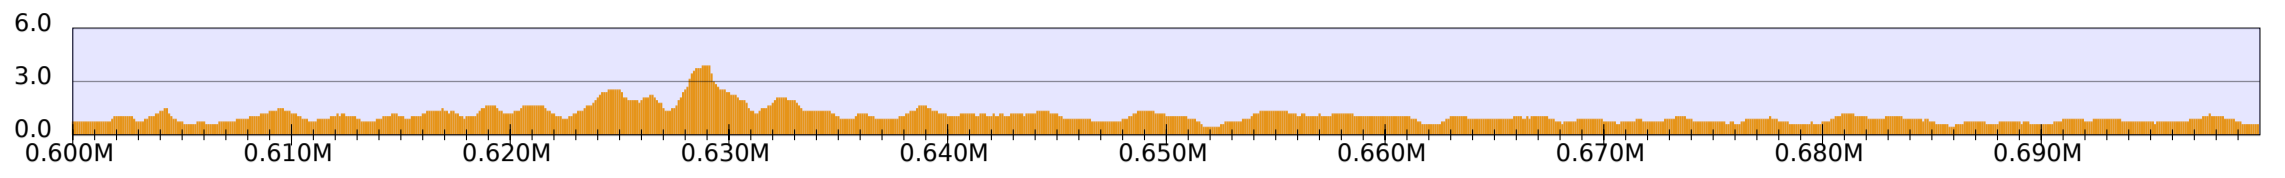

genes

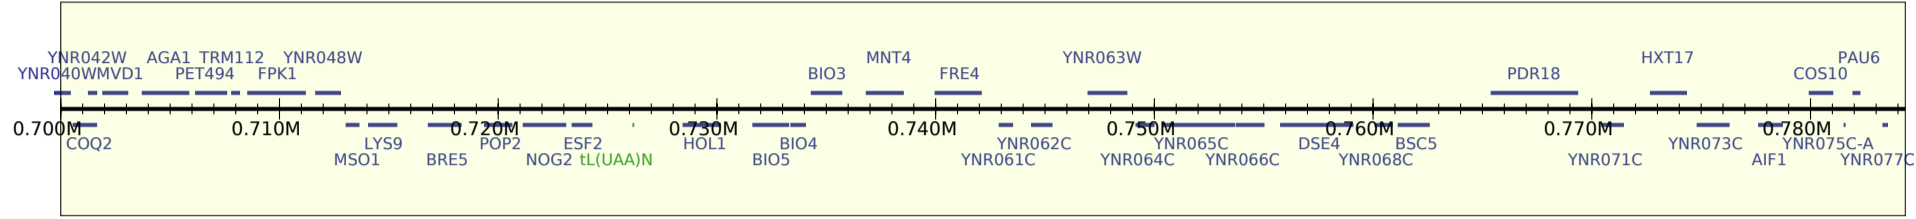

Smc2\_pnNZ

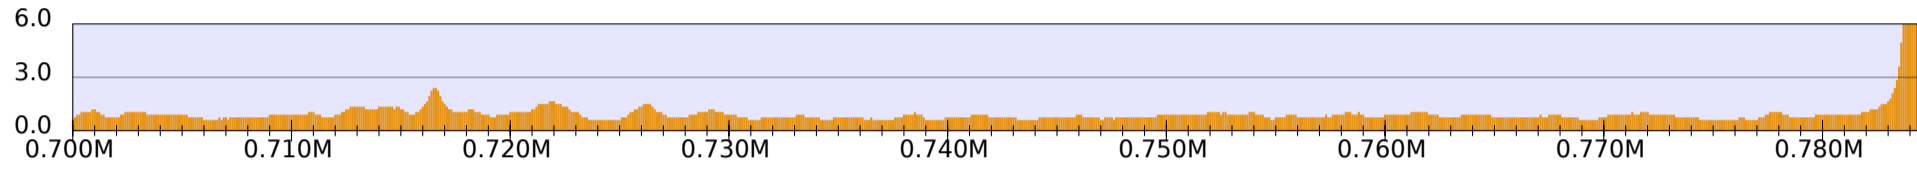







chrXVI\_1

genes

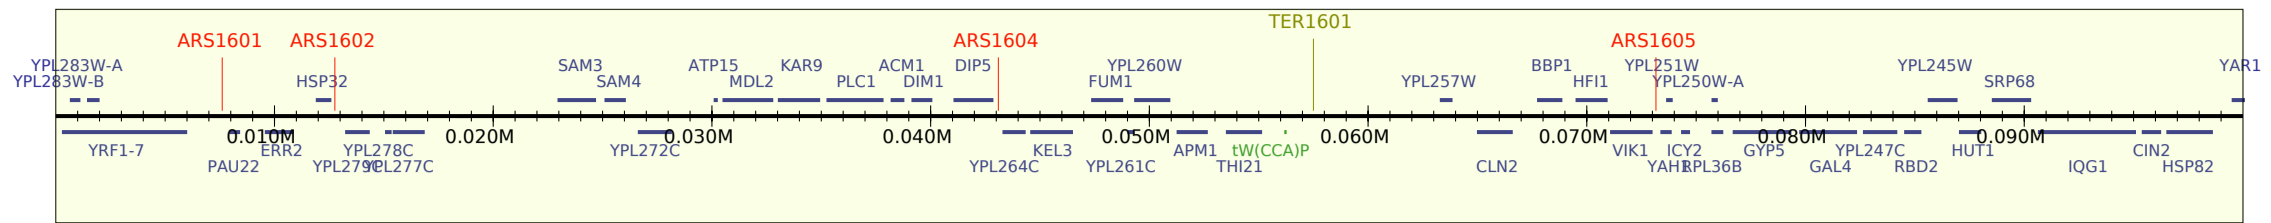

Smc2\_pnNZ

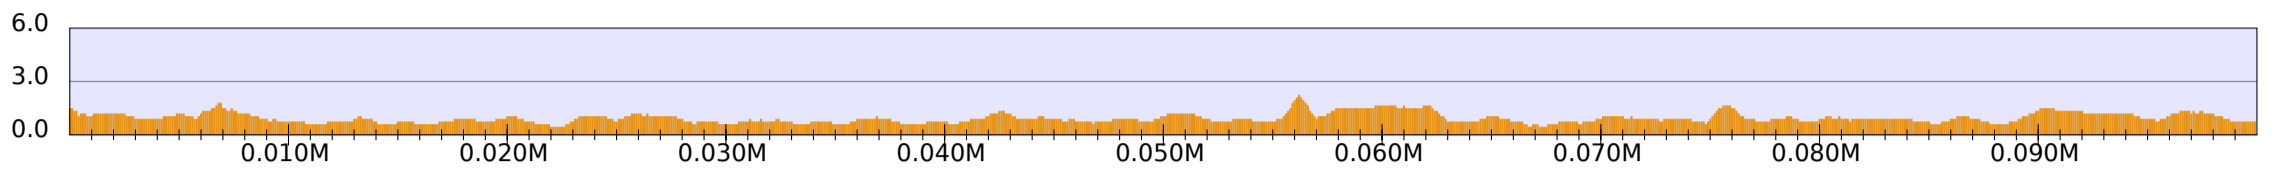

genes

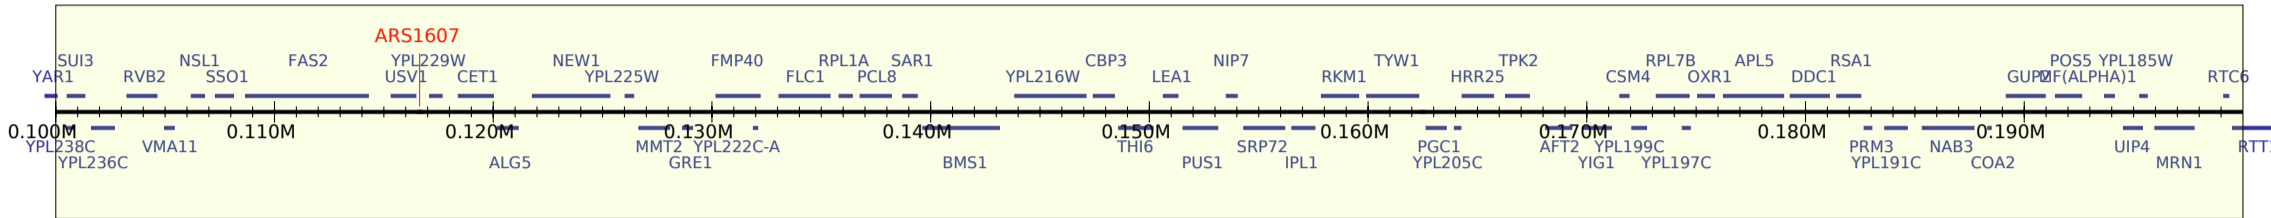

Smc2\_pnNZ

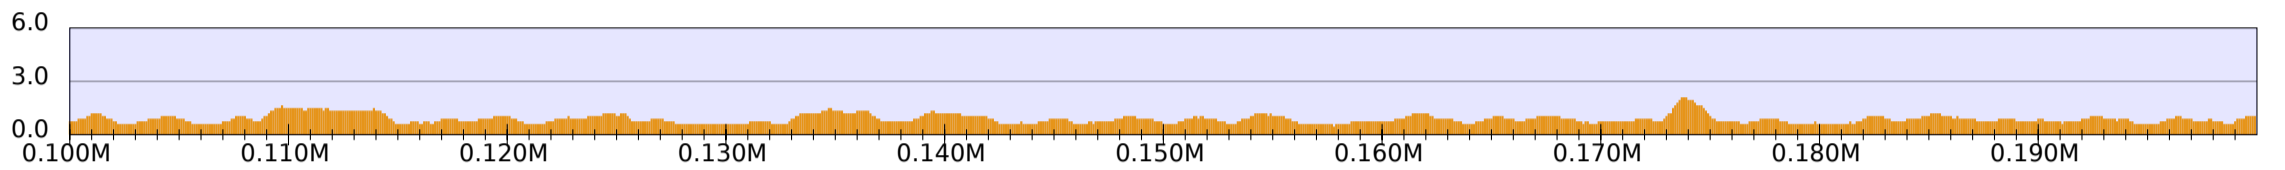

genes

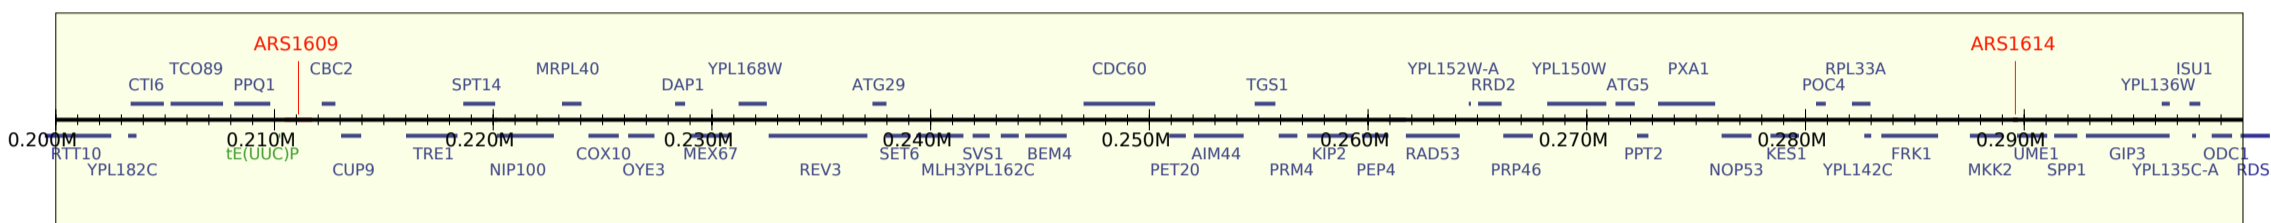

Smc2\_pnNZ

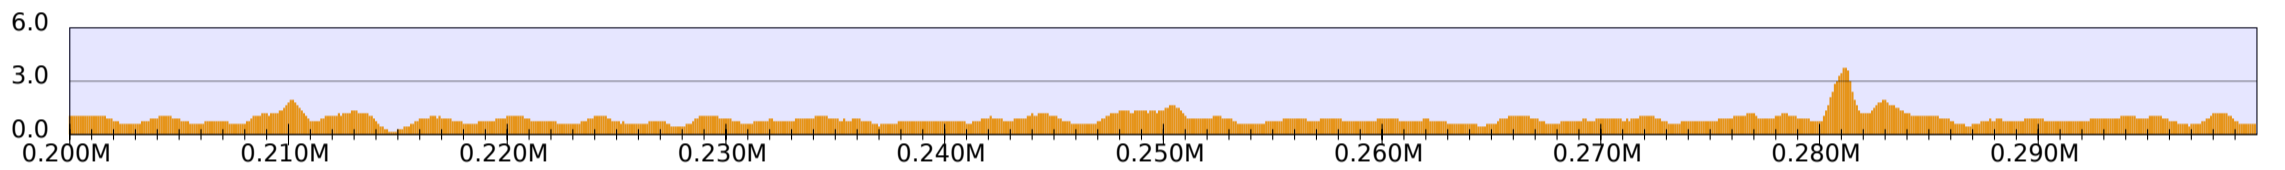

genes

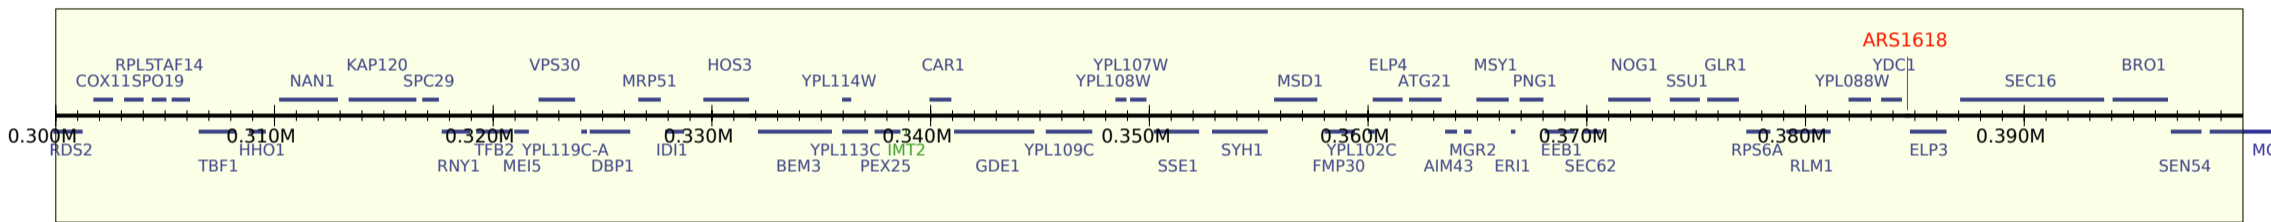

Smc2\_pnNZ

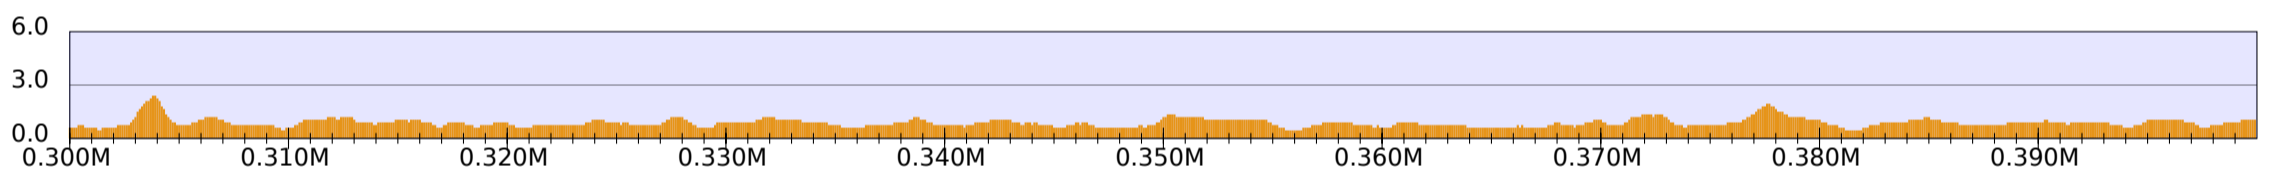

genes

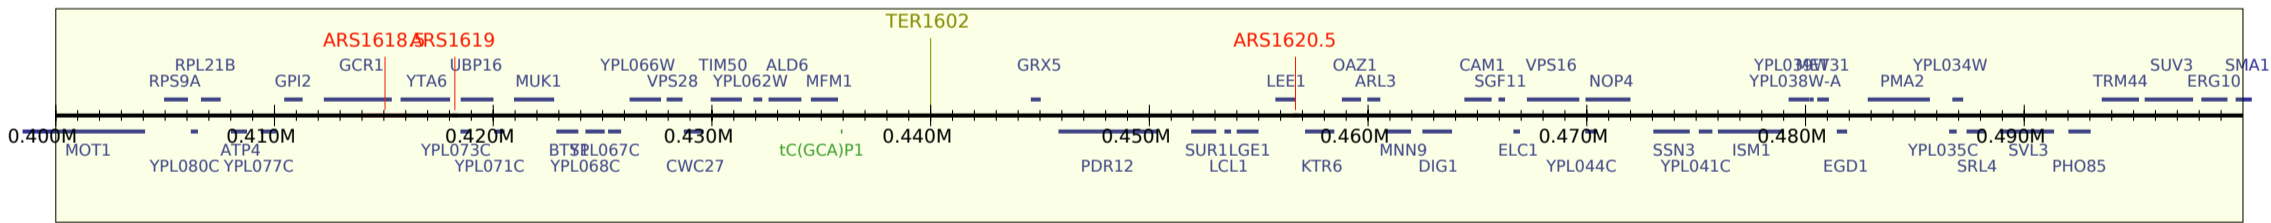

Smc2\_pnNZ

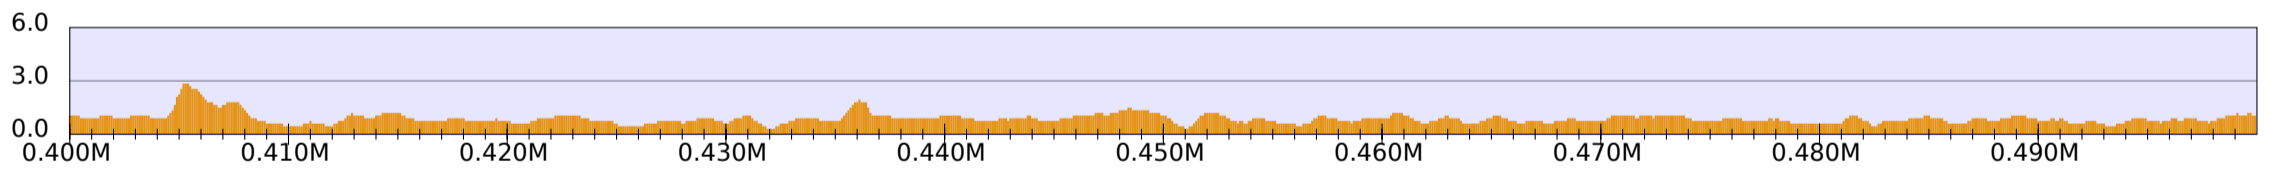

genes

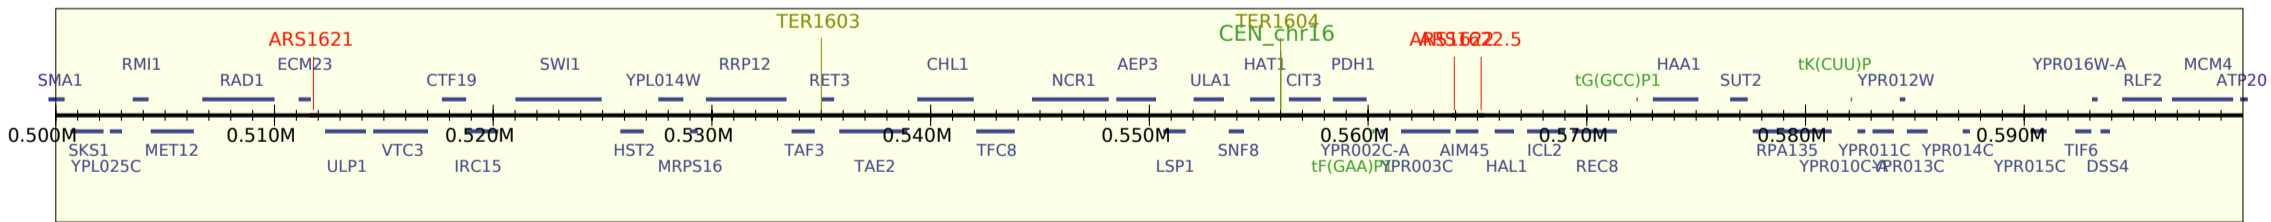



chrM

genes

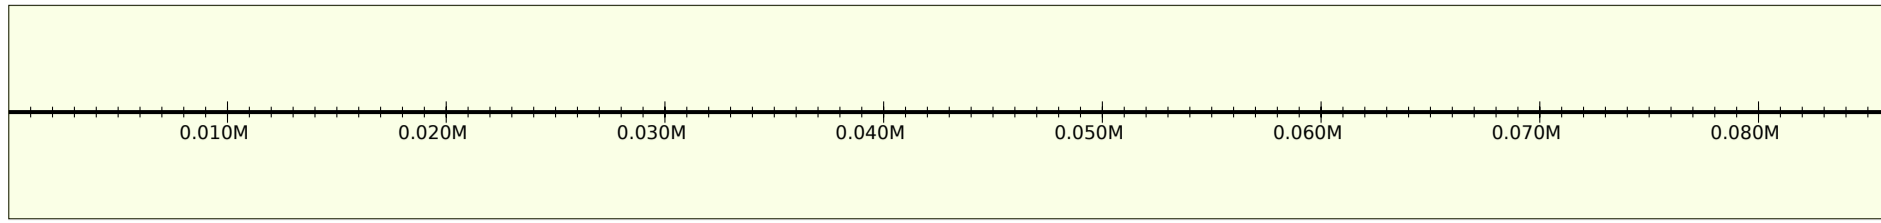

Smc2\_pnNZ

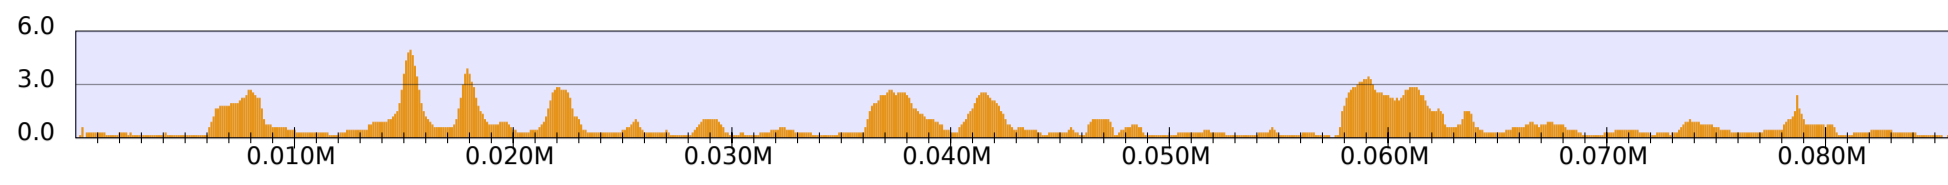

chr2micron

genes

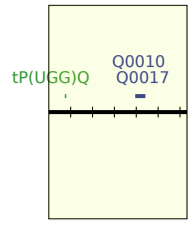

Smc2\_pnNZ

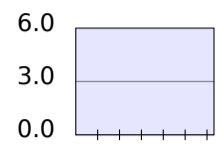

Supplement: mmc3.pdf [file mmc3.pdf]
